# Supplementary material
Source: PubMed Central journal article supplement (PMC10482171)
Supplement: NIHMS1922387-supplement-cn-2020-00619s_SI.pdf [file NIHMS1922387-supplement-cn-2020-00619s_SI.pdf]

## **Supporting Information:**

### **Novel compounds targeting neuropilin receptor 1 with potential to interfere with SARS-CoV-2 virus entry**

Samantha Perez-Miller<sup>1,2,†</sup>, Marcel Patek<sup>3,†</sup>, Aubin Moutal<sup>1</sup>, Paz Duran de Haro<sup>1</sup>, Carly R. Cabel<sup>4,5</sup>, Curtis A. Thorne<sup>4,5,6</sup>, Samuel K. Campos<sup>5,6,7</sup>, and Rajesh Khanna<sup>1,2,8\*</sup>

<sup>1</sup>Department of Pharmacology, College of Medicine, The University of Arizona, Tucson, AZ, United States; <sup>2</sup>The Center for Innovation in Brain Sciences, The University of Arizona Health Sciences, Tucson, Arizona, USA; <sup>3</sup>Bright Rock Path Consulting, LLC, Tucson, Arizona; <sup>4</sup>Department of Cellular & Molecular Medicine, College of Medicine, The University of Arizona; <sup>5</sup>Cancer Biology Graduate Interdisciplinary Program, University of Arizona, <sup>6</sup>Bio5 Institute, University of Arizona, <sup>7</sup>Department of Immunobiology, College of Medicine, University of Arizona; and <sup>8</sup>Regulonix LLC, Tucson, AZ, USA.

<sup>†</sup>Contributed equally to this work

\*To whom correspondence should be addressed: Dr. Rajesh Khanna, Department of Pharmacology, College of Medicine, University of Arizona, 1501 North Campbell Drive, P.O. Box 245050, Tucson, AZ 85724, USA Office phone: (520) 626-4281; Fax: (520) 626-2204; Email: [rkhanna@arizona.edu](mailto:rkhanna@arizona.edu)

**Supplementary Table 1.** Physico-chemical properties and structures of top 100 hits, arranged by docking score.

| Cmpd | SMILES                                                                 | Glide_gscore | Set | Mw    | clogP | HB-D | HB-A | Lipinski | NHOH | RotB | TPSA |
|------|------------------------------------------------------------------------|--------------|-----|-------|-------|------|------|----------|------|------|------|
| V51  | COc1cccc(-c2cc(=O)[nH]c(N3cccc3)n2)c1                                  | -12.1        | DIV | 293.3 | 3.2   | 2    | 4    | Yes      | 2    | 4    | 67   |
| V52  | CC(C)C1cc(C(=O)NCC2COC2)nc(=O)[nH]1                                    | -11.5        | DIV | 279.3 | 0.7   | 2    | 4    | Yes      | 2    | 5    | 84   |
| V53  | O=C(O)CNc1nc2[nH]c2c(=O)[nH]1                                          | -11.3        | NP  | 209.2 | -0.9  | 4    | 5    | Yes      | 4    | 3    | 124  |
| V54  | O=C(O)C1cnc(-c2ccnc2)n1c1=O                                            | -11          | NP  | 231.2 | 0.5   | 2    | 4    | Yes      | 2    | 3    | 96   |
| V55  | O=C1C(O)C(C2cccc2)N1                                                   | -11          | NP  | 191.2 | 0.5   | 2    | 2    | Yes      | 2    | 2    | 49   |
| V56  | COC(=O)N1CCN2C(=O)C(C3ccc(O)cc3)NC(=O)C2C1                             | -10.9        | NP  | 347.4 | -0.9  | 2    | 5    | Yes      | 2    | 4    | 99   |
| V57  | CC(C)C1cc(C(=O)N2CCN1c3nccc3)C2)nc(=O)[nH]1                            | -10.8        | DIV | 342.4 | 0.7   | 1    | 6    | Yes      | 1    | 4    | 95   |
| V58  | O=C(O)C1c1ccc(O)c(O)c1)CC(C1ccc(O)c(O)c1)C(=O)O                        | -10.7        | NP  | 358.3 | 2.4   | 5    | 6    | Yes      | 5    | 7    | 135  |
| V59  | O=C(O)C1c1ccc(O)c(O)c1)CC(C1ccc(O)c(O)c1)C(=O)O                        | -10.7        | NP  | 358.3 | 2.4   | 5    | 6    | Yes      | 5    | 7    | 135  |
| V510 | CC(C)C1ncc(C(=O)O)c(=O)[nH]1                                           | -10.7        | NP  | 196.2 | 0.5   | 2    | 3    | Yes      | 2    | 3    | 83   |
| V511 | CC(N+)(C)(O)CC1C(=O)OC2C(CCC4(O)C42)C(C)CCC13                          | -10.6        | NP  | 322.5 | 2.6   | 0    | 3    | Yes      | 0    | 3    | 39   |
| V512 | O=c1[n-]c1(Br)n2[nH]c1[nH+]c12                                         | -10.5        | NP  | 215   | -0.5  | 1    | 2    | Yes      | 2    | 0    | 74   |
| V513 | [C\$-](CCON)CC1OC(n2nc3c(N)ncn32)C(O)C1O                               | -10.5        | NP  | 357.4 | -1.8  | 4    | 10   | Yes      | 6    | 6    | 155  |
| V514 | CC(C)C1cc(C(=O)N)C(C2ccc3nnc32)nc(=O)[nH]1                             | -10.4        | DIV | 357.4 | 2.2   | 1    | 6    | Yes      | 1    | 5    | 92   |
| V515 | Cc1nc(N2COC2)nc1-c1cc(=O)[nH]c(Nc2cccc2)n1                             | -10.4        | DIV | 364.4 | 2.1   | 2    | 7    | Yes      | 2    | 4    | 96   |
| V516 | COc1cccc1Nc1nc(-c2cnc(N3CCCC3)n2)cc(=O)[nH]1                           | -10.4        | DIV | 378.4 | 2.9   | 2    | 7    | Yes      | 2    | 5    | 96   |
| V517 | C[N+](C)(C)C1CCCC(=O)C1                                                | -10.3        | NP  | 170.3 | 1.6   | 0    | 1    | Yes      | 0    | 1    | 17   |
| V518 | CC(C)C1cc(C(=O)N)C(C)C(C2cnc2)nc(=O)[nH]1                              | -10.3        | DIV | 329.4 | 1.5   | 1    | 5    | Yes      | 1    | 6    | 92   |
| V519 | CC(C)C1cc(C(=O)N)C2ccc3c(2)C(CCO3)nc(=O)[nH]1                          | -10.3        | DIV | 341.4 | 2.2   | 2    | 4    | Yes      | 2    | 5    | 84   |
| V520 | CC1CCC2C(C[N+](C)(C)C(C)C(=O)OC23)CCC1(C)OC13                          | -10.3        | NP  | 308.4 | 2.2   | 0    | 3    | Yes      | 0    | 2    | 39   |
| V521 | CC(C)C1cc(C(=O)O)cc(=O)[nH]1                                           | -10.2        | NP  | 195.2 | 1.3   | 2    | 2    | Yes      | 2    | 3    | 70   |
| V522 | O=c1[n-]cnc2c1[nH+]cn2C1O(CO)C(O)C1O                                   | -10.2        | NP  | 268.2 | -3.2  | 3    | 7    | Yes      | 4    | 2    | 133  |
| V523 | CC(O)C(O)C1Cnc2nc[nH]c(=O)c2N1                                         | -10.2        | NP  | 226.2 | -1.3  | 5    | 6    | Yes      | 5    | 2    | 110  |
| V524 | C[N+](C)(C)CC1(C(=O)O)CC(O)C(O)N1                                      | -10.1        | NP  | 217.2 | -0.8  | 3    | 3    | Yes      | 3    | 3    | 90   |
| V525 | Cc1ccc(C(=O)N2CCCCc3nnc(C)[nH]3)C2)cc(=O)[nH]1                         | -10.1        | DIV | 301.4 | 1.1   | 2    | 4    | Yes      | 2    | 2    | 95   |
| V526 | C[N+](C)(C)CC1(C(=O)O)C1=O                                             | -10.1        | NP  | 202.2 | -0.3  | 2    | 2    | Yes      | 2    | 4    | 75   |
| V527 | O=C(O)C(O)C=C1ccc(O)c(O)c1=C1C1ccc(O)c(O)c1                            | -10          | NP  | 328.3 | 2.8   | 5    | 5    | Yes      | 5    | 5    | 118  |
| V528 | CCc1ccc(C(=O)N)CC(C)C2ccc2cc(=O)[nH]1                                  | -10          | DIV | 315.4 | 1.6   | 1    | 4    | Yes      | 1    | 7    | 75   |
| V529 | O=C(O)C(C)C1cccc1)NCC1(O)OC(CO)C(O)C1O                                 | -9.9         | NP  | 327.3 | -1.9  | 6    | 7    | No_HBD   | 6    | 7    | 139  |
| V530 | O=C(CCOc1cccc1)NC1CC(=O)N(C2ccc(F)2)C1                                 | -9.9         | DIV | 356.4 | 2.5   | 1    | 3    | Yes      | 1    | 7    | 59   |
| V531 | CC(O)(C(=O)O)C(O)COC(=O)C=C1ccc(O)c(O)c1                               | -9.8         | NP  | 312.3 | -0.1  | 5    | 7    | Yes      | 5    | 6    | 145  |
| V532 | COc1cc2cc1c1C(=O)OC21C(C)C(=O)O1                                       | -9.8         | NP  | 276.3 | 2.3   | 0    | 5    | Yes      | 0    | 1    | 62   |
| V533 | CC(C)C1cc(C(=O)N)C2CCC(O)C3cccc3)C2)nc(=O)[nH]1                        | -9.8         | DIV | 370.5 | 2.2   | 1    | 5    | Yes      | 1    | 6    | 88   |
| V534 | O=C1CCC(C2cccc2)N1                                                     | -9.8         | NP  | 175.2 | 1.5   | 1    | 1    | Yes      | 1    | 2    | 29   |
| V535 | COc1cccc1Nc1nccc(=O)[nH]1                                              | -9.8         | DIV | 218.2 | 0.9   | 2    | 5    | Yes      | 2    | 3    | 80   |
| V536 | CCCCC1(O)NC(=O)C2OC21                                                  | -9.7         | NP  | 171.2 | -0.2  | 2    | 3    | Yes      | 2    | 3    | 62   |
| V537 | CC1=C(C)COC2OC(CO)C(O)C2O)C(C)C(C)C(=O)O)CC1                           | -9.7         | NP  | 362.4 | -1.8  | 6    | 8    | No_HBD   | 6    | 7    | 157  |
| V538 | O=c1cnc(Nc2cccc2O)[nH]1                                                | -9.7         | DIV | 204.2 | 0.6   | 3    | 5    | Yes      | 3    | 2    | 91   |
| V539 | CCc1ccc(O)N(C)C2ccc(O)C3cccc23)cc(=O)[nH]1                             | -9.6         | DIV | 351.4 | 2.8   | 1    | 4    | Yes      | 1    | 5    | 75   |
| V540 | CC1c(C(=O)N)CC2ccc(O)c2)C(=O)O)C(=O)OC2ccc3ccc(C(C)C(C)C)3cc12         | -9.6         | NP  | 477.5 | 4.2   | 3    | 6    | Yes      | 3    | 6    | 130  |
| V541 | O=C1OC2ccc(O)c(O)c2)C(CO)C1=C1c1ccc(O)c(O)c1                           | -9.6         | NP  | 344.3 | 1.8   | 5    | 7    | Yes      | 5    | 3    | 127  |
| V542 | ON1CC(CO)CC(c2ccc(-O)[nH]2)C1                                          | -9.6         | NP  | 222.3 | 0.4   | 2    | 3    | Yes      | 2    | 2    | 56   |
| V543 | CC1cccc1Nc1nccc(=O)[nH]1                                               | -9.6         | DIV | 216.2 | 1.5   | 2    | 4    | Yes      | 2    | 3    | 71   |
| V544 | [Cn-]1cnc(C2OC(CO)C(O)C2O)c2[nH]c(-O)c21                               | -9.6         | NP  | 299.3 | -3.5  | 5    | 7    | Yes      | 5    | 2    | 144  |
| V545 | NC(=O)CC(NC(=O)C)C1cccc1)NC(=O)N1CC(=O)Nc2cccc21)C(=O)O                | -9.6         | NP  | 453.0 | 0.2   | 5    | 5    | Yes      | 6    | 8    | 171  |
| V546 | CCc1ccc(C(=O)N)C2CC3nc(-c4cccc(O)c4)[nH]c3C2)cc(=O)[nH]1               | -9.6         | DIV | 378.4 | 2.5   | 2    | 4    | Yes      | 2    | 4    | 91   |
| V547 | [Cn-]1c[nH]c2c(COC(CO)C(O)C3O)nc-2c1N                                  | -9.6         | NP  | 282.3 | 2.5   | 5    | 7    | Yes      | 6    | 2    | 141  |
| V548 | CCCC/C=C/C(C)C(O)OC1=O                                                 | -9.6         | NP  | 196.2 | 1.9   | 1    | 3    | Yes      | 1    | 4    | 47   |
| V549 | O=C(C)CN1CC(c2cccc2)CC1=O)N1CCCN(C(=O)c2cccc2)CC1                      | -9.5         | DIV | 395.5 | 2     | 0    | 4    | Yes      | 0    | 4    | 74   |
| V550 | NC(CCN)1cccc(C(=O)O)c1(C)C(=O)O                                        | -9.5         | NP  | 225.2 | -0.5  | 3    | 3    | Yes      | 4    | 5    | 105  |
| V551 | O=C(O)C1cc(=O)[nH]c(-O)[nH]1                                           | -9.5         | NP  | 170.1 | -1.3  | 3    | 3    | Yes      | 3    | 2    | 103  |
| V552 | O=C1N(Cc2cccc2)C2C3+3CCCC2GN1C1cccc1                                   | -9.5         | NP  | 365.5 | 3.7   | 0    | 1    | Yes      | 0    | 4    | 24   |
| V553 | O=C(Cc1ccc(O)c(O)c1)O)C1cccc(O)c1O                                     | -9.5         | NP  | 290.3 | 2     | 4    | 6    | Yes      | 4    | 4    | 107  |
| V554 | Cc1ccc2ccc3cc(=O)C(=O)NC(C4c[nH]c5cccc45)C(=O)O)C(C)3cc12              | -9.4         | NP  | 458.4 | 4     | 3    | 5    | Yes      | 3    | 6    | 126  |
| V555 | O=C(O)C1c1ccc(O)c(O)c1)OC(C(=O)O)C(O)C(=O)O                            | -9.4         | NP  | 312.2 | -0.4  | 5    | 7    | Yes      | 5    | 6    | 162  |
| V556 | Cc1c(C)[n-]([O-])cn1C(CCC(=O)O)C(=O)O                                  | -9.4         | NP  | 242.2 | 0.2   | 2    | 4    | Yes      | 2    | 5    | 106  |
| V557 | CC(C)C1cc(C(=O)N)C2CC3cccc3C2)nc(=O)[nH]1                              | -9.4         | DIV | 317.4 | 2.2   | 1    | 4    | Yes      | 1    | 3    | 66   |
| V558 | O=C1N(C)C(F)F)F)C2(CCC2)N1                                             | -9.4         | NP  | 206.2 | 1.7   | 2    | 1    | Yes      | 2    | 0    | 41   |
| V559 | O=C(O)CNc1nc2[nH]cnc2c(=O)[nH]1                                        | -9.4         | NP  | 209.2 | -0.9  | 4    | 5    | Yes      | 4    | 3    | 124  |
| V560 | O=P(O)(O)OC1OC(O)(OP(=O)(O)O)C(O)C1O                                   | -9.4         | NP  | 326.1 | -2    | 7    | 8    | No_HBD   | 7    | 5    | 203  |
| V561 | COc1cc(OC)c2c(C)C(C(=O)N)C(C3ccc(O)cc3)C(=O)O)C(=O)OC2c1               | -9.4         | NP  | 441.4 | 2.3   | 3    | 7    | Yes      | 3    | 8    | 135  |
| V562 | CCc1ccc(C(=O)N)C2CC(C2)cc(=O)[nH]1                                     | -9.4         | DIV | 246.3 | 1.7   | 1    | 2    | Yes      | 1    | 3    | 53   |
| V563 | Cc1c(O)C(=O)C(COP(=O)(O)O)[nH]1O-}                                     | -9.4         | NP  | 263.1 | -0.2  | 3    | 5    | Yes      | 3    | 4    | 131  |
| V564 | O=C(O)C1ccc(=O)[nH]c(=O)[nH]1                                          | -9.3         | NP  | 156.1 | -1.2  | 3    | 3    | Yes      | 3    | 1    | 103  |
| V565 | CCc1ccc(C(=O)N)C2COC(C3ccc(F)3)C2)cc(=O)[nH]1                          | -9.3         | DIV | 330.4 | 2.3   | 1    | 3    | Yes      | 1    | 3    | 62   |
| V566 | NC(C(=O)O)C1C(C)N(=O)[O-]O1                                            | -9.3         | NP  | 194.6 | -0.8  | 2    | 4    | Yes      | 3    | 2    | 99   |
| V567 | COCC1OC([n-]2nnc3c(N)[nH]cnc23)C(O)C1O                                 | -9.3         | NP  | 282.3 | -2    | 4    | 7    | Yes      | 5    | 3    | 130  |
| V568 | CC(C)CC(NC(=O)C)C(O)C1C=C(CD=O)O1)C1C2ccc(O)c2C(=O)O1                  | -9.3         | NP  | 389.4 | 0.8   | 3    | 7    | Yes      | 3    | 6    | 122  |
| V569 | Cc1ccc(=O)[nH]c(C)C1n1                                                 | -9.2         | NP  | 152.2 | 1.2   | 1    | 2    | Yes      | 1    | 1    | 46   |
| V570 | O=C(O)C1ccc([n-]2COC(CO)C(O)C2O)c1                                     | -9.2         | NP  | 256.2 | -1.7  | 4    | 5    | Yes      | 4    | 3    | 111  |
| V571 | C[N+](C)(C)CC1CCC(=O)O1                                                | -9.2         | NP  | 158.2 | 0.4   | 0    | 2    | Yes      | 0    | 2    | 26   |
| V572 | CC(O)C(O)C1ONc2nc(N)[nH]c(-O)c2N1                                      | -9.2         | NP  | 239.2 | -1.5  | 5    | 7    | Yes      | 6    | 2    | 133  |
| V573 | O=C(O)C1c1ccc(O)c(O)c1)OC1C=C(C(=O)O)C3)cc12)OC(Cc1ccc(O)c(O)c1)C(=O)O | -9.2         | NP  | 492.4 | 3.9   | 6    | 9    | No_HBD   | 6    | 7    | 178  |
| V574 | O=C(O)C1CCC2(C=C(O)C(C2)C(=O)N1                                        | -9.2         | NP  | 209.2 | -0.6  | 3    | 3    | Yes      | 3    | 1    | 87   |
| V575 | O=C(O)C1ccc([n-]2COC(CO)C(O)C2O)c1                                     | -9.2         | NP  | 256.2 | -1.7  | 4    | 5    | Yes      | 4    | 3    | 111  |
| V576 | O=C(O)C1ccc(=O)[nH]c(-O)[nH]1                                          | -9.2         | NP  | 156.1 | -1.2  | 3    | 3    | Yes      | 3    | 1    | 103  |
| V577 | O=c1[nH]cnc2c1nnc2C1OC(COP(=O)(O)O)C(O)C1O                             | -9.2         | NP  | 348.2 | -2.2  | 5    | 9    | Yes      | 5    | 4    | 180  |
| V578 | O=C(O)C1ccc(=O)[nH]c(-O)[nH]1                                          | -9.2         | NP  | 156.1 | -1.2  | 3    | 3    | Yes      | 3    | 1    | 103  |
| V579 | Cc1c(CCC(=O)N)C(Cc2ccc(O)c2)C(=O)O)C(=O)OC2cc(O)ccc12                  | -9.2         | NP  | 411.4 | 2.3   | 4    | 6    | Yes      | 4    | 7    | 137  |
| V580 | O=C1CCC(CN(C2cccc2)C2nc3cccc3c(=O)[nH]2)N1                             | -9.2         | DIV | 369.2 | 1.7   | 2    | 6    | Yes      | 2    | 6    | 91   |
| V581 | O=C(O)CC(Cc1cccc1)OC1OC(CO)C(O)C1O                                     | -9.2         | NP  | 356.4 | -0.7  | 5    | 7    | Yes      | 5    | 8    | 137  |
| V582 | NC(=O)CC(NC(=O)C)C1cccc1)NC(=O)N1CC(=O)Nc2cccc21)C(=O)O                | -9.2         | NP  | 467.5 | 0.6   | 5    | 5    | Yes      | 6    | 9    | 171  |
| V583 | COC1=C2C=C2(C2CC(C)C(O)C2=O)COC1=O                                     | -9.2         | NP  | 262.3 | 2     | 0    | 4    | Yes      | 0    | 2    | 53   |
| V584 | O=C(O)C1c1ccc(O)c(O)c1)OC1C=C(C(=O)O)OC(C(=O)O)C1O                     | -9.2         | NP  | 366.3 | -0.2  | 5    | 8    | Yes      | 5    | 5    | 171  |
| V585 | CC(C)C(CO)NC(=O)CC1NC(=O)N(Cc2ccc3c(2)OC3)C1=O                         | -9.2         | NP  | 391.4 | 0.7   | 3    | 6    | Yes      | 3    | 8    | 117  |
| V586 | CC1cc(ON(C)C2ccc(=O)[nH]c(-O)[nH]2)no1                                 | -9.2         | DIV | 250.3 | 0     | 2    | 5    | Yes      | 2    | 4    | 95   |
| V587 | CC(=O)C(Cc1ccc(O)c(O)c1)OC1=C(O)C=C1c1ccc(O)c(O)c1                     | -9.1         | NP  | 374.3 | 1.8   | 4    | 8    | Yes      | 4    | 6    | 134  |
| V588 | CO(=O)NC1C(O)C2ccc(C)cc2)OC(CO)C(O)C1O                                 | -9.1         | NP  | 325.4 | -0.4  | 4    | 6    | Yes      | 4    | 4    | 108  |
| V589 | CCC(=O)NC(C(=O)O)C(N+)(C)C(C)C                                         | -9.1         | NP  | 217.3 | 0.1   | 2    | 2    | Yes      | 2    | 6    | 66   |
| V590 | COc1ccc2c(C)C(CCC(=O)N)C(CO)C3cccc3)cc(=O)OC2c1                        | -9.1         | NP  | 381.4 | 2.4   | 2    | 5    | Yes      | 2    | 7    | 89   |
| V591 | C[N+](C)(C)CC1(C(=O)O)CC(O)C(=O)N1                                     | -9.1         | NP  | 217.2 | -1.6  | 3    | 3    | Yes      | 3    | 3    | 87   |
| V592 | O=c1[n-]cnc2c1[nH+]cn2C1C=C(CO)C(O)C1O                                 | -9.1         | NP  | 264.2 | -2.6  | 3    | 6    | Yes      | 4    | 2    | 124  |
| V593 | CC(=O)OC(C(=O)O)C(N+)(C)C(C)C                                          | -9.1         | NP  | 204.2 | 0.1   | 1    | 3    | Yes      | 1    | 5    | 64   |
| V594 | O=C(CN1CCCCC1=O)NC(CO)CC1cccc1                                         | -9.1         | DIV | 318.4 | 1.5   | 2    | 3    | Yes      | 2    | 7    | 70   |
| V595 | O=C(O)C(Nc1nc2[nH]cnc2c(=O)[nH]1                                       | -9.1         | NP  | 209.2 | -0.9  | 4    | 5    | Yes      | 4    | 3    | 124  |
| V596 |                                                                        |              |     |       |       |      |      |          |      |      |      |
